# Supplementary material for: Risk of orthostatic hypotension associated with sodium-glucose cotransporter-2 inhibitor treatment: A meta-analysis of randomized controlled trials
Source: PubMed Central journal article supplement — Diab Vasc Dis Res. 2020 Sep 28;17(5):1479164120953625. doi: 10.1177/1479164120953625 (PMC7919209; doi:10.1177/1479164120953625), 2020-09-28

Figure S1- Risk of bias for each study, as evaluated by the Cochrane risk-of-bias tool

|                       | Random sequence generation (selection bias) | Allocation concealment (selection bias) | Blinding of participants and personnel (performance bias) | Blinding of outcome assessment (detection bias) | Incomplete outcome data (attrition bias) | Selective reporting (reporting bias) | Other bias |
|-----------------------|---------------------------------------------|-----------------------------------------|-----------------------------------------------------------|-------------------------------------------------|------------------------------------------|--------------------------------------|------------|
| Bailey 2010           | +                                           | +                                       | +                                                         | +                                               | +                                        | +                                    | -          |
| Bailey 2016           | +                                           | +                                       | +                                                         | ?                                               | +                                        | +                                    | -          |
| Bode 2013             | +                                           | +                                       | +                                                         | +                                               | +                                        | +                                    | -          |
| Cefalu 2013           | +                                           | ?                                       | +                                                         | +                                               | +                                        | +                                    | -          |
| Inagaki 2014          | +                                           | +                                       | +                                                         | -                                               | +                                        | +                                    | -          |
| Inoue 2019            | +                                           | +                                       | ?                                                         | ?                                               | +                                        | +                                    | -          |
| Kaku 2014             | +                                           | +                                       | +                                                         | +                                               | +                                        | +                                    | -          |
| Lavalle-González 2013 | +                                           | ?                                       | +                                                         | +                                               | +                                        | +                                    | -          |
| Matthaei 2015         | +                                           | +                                       | +                                                         | +                                               | +                                        | +                                    | -          |
| McMurray 2019         | +                                           | +                                       | +                                                         | +                                               | +                                        | +                                    | -          |
| Schernthaler 2013     | +                                           | +                                       | +                                                         | +                                               | +                                        | +                                    | -          |
| Stenlöf 2013          | -                                           | -                                       | +                                                         | +                                               | +                                        | +                                    | -          |
| Tikkanen 2015         | +                                           | ?                                       | +                                                         | +                                               | -                                        | +                                    | -          |
| Wan Seman 2016        | ?                                           | ?                                       | +                                                         | -                                               | ?                                        | +                                    | -          |
| Weber 2016            | +                                           | ?                                       | +                                                         | +                                               | +                                        | +                                    | -          |
| Yale 2013             | +                                           | +                                       | +                                                         | +                                               | +                                        | +                                    | -          |

Figure S2-Funnel plot of sodium-glucose cotransporter-2(SGLT2) inhibitors vs

### control for risk of orthostatic hypotension

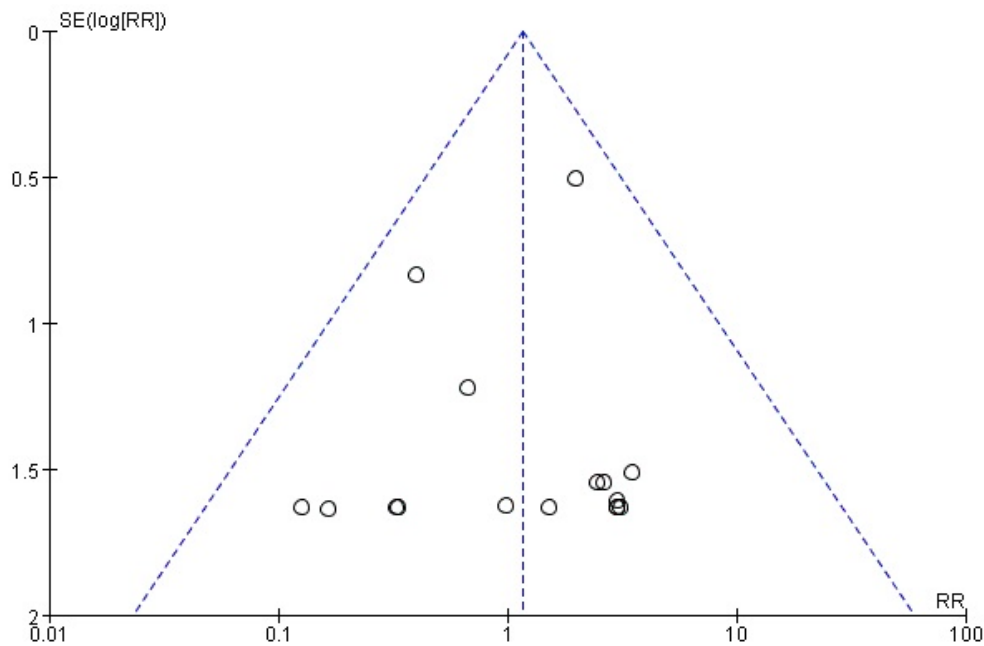

Figure S3-Forest plot of the effect of different comparison for orthostatic hypotension

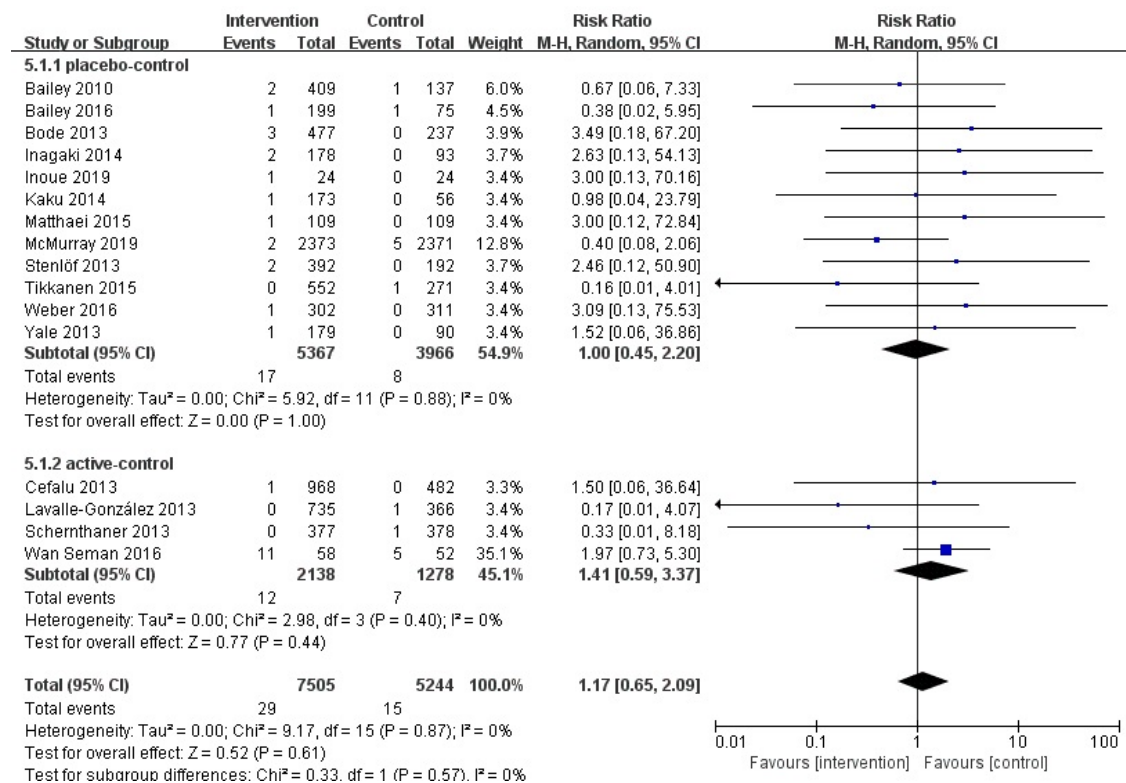

Figure S4-Forest plot of the effect of different T2DM duration for orthostatic hypotension

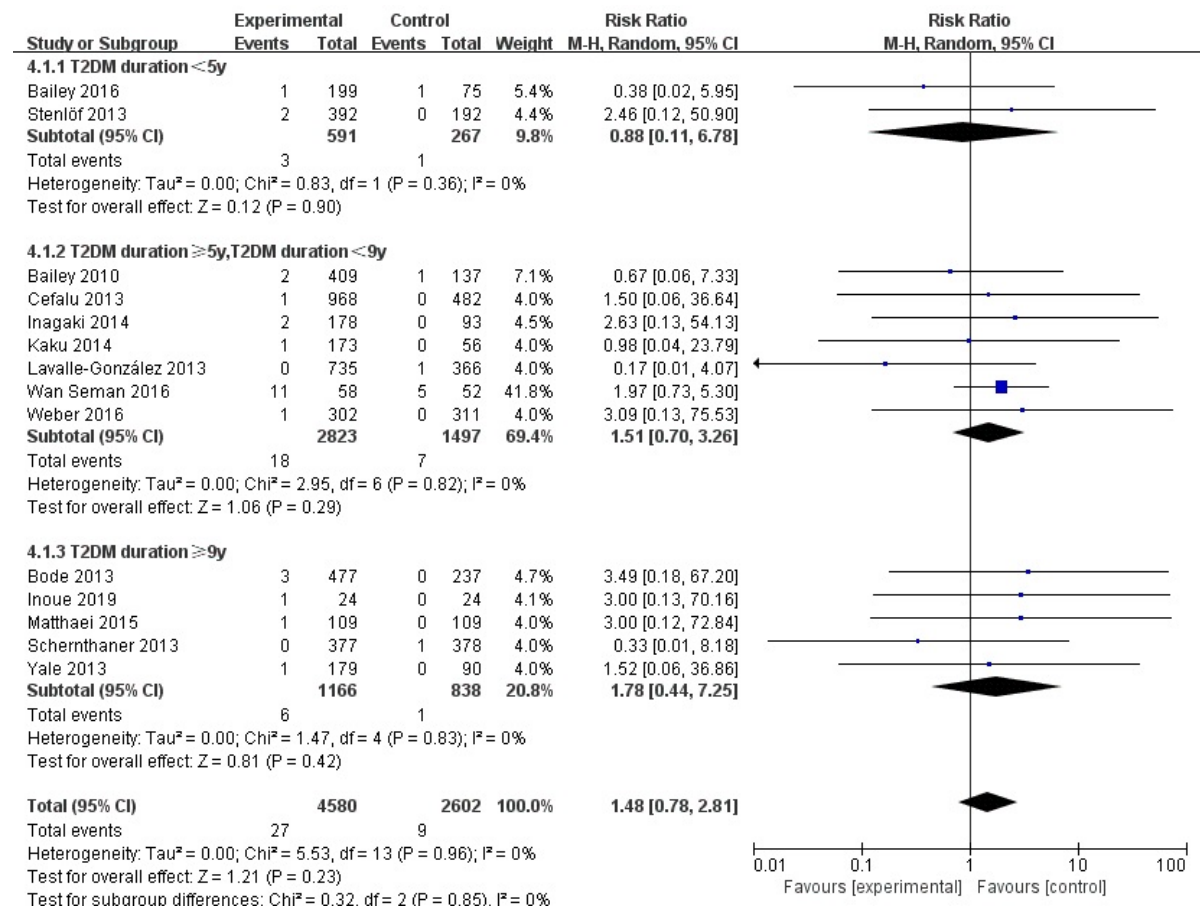

Figure S5-Forest plot of the effect of baseline blood pressure for orthostatic hypotension

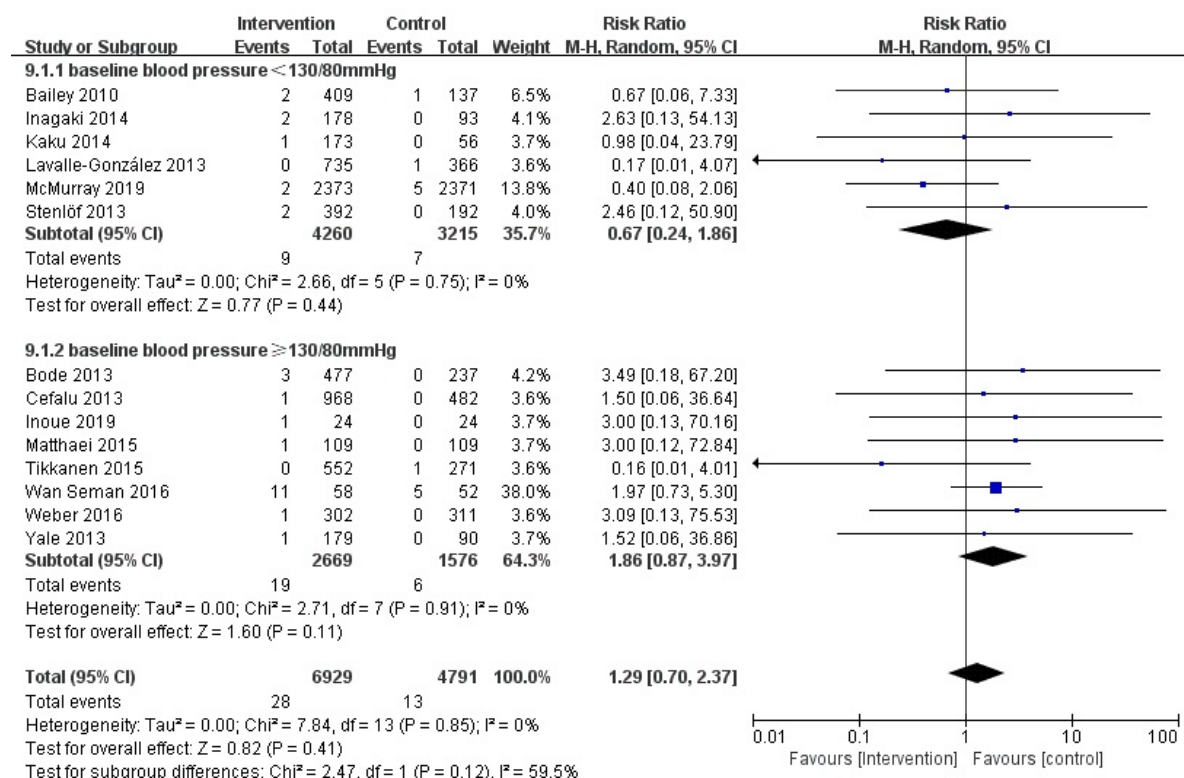

Figure S6-Forest plot of the effect of baseline HbA1c (%) for orthostatic hypotension

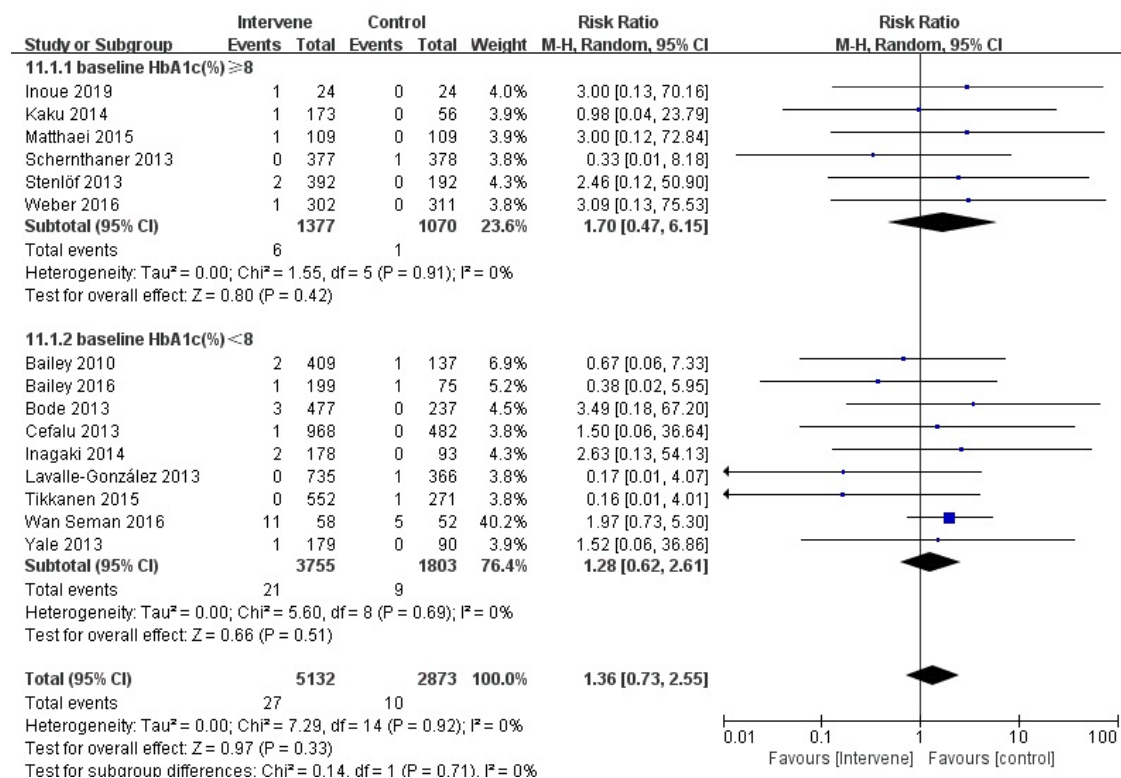

Figure S7-Forest plot of the effect of with/without established CVD for orthostatic hypotension

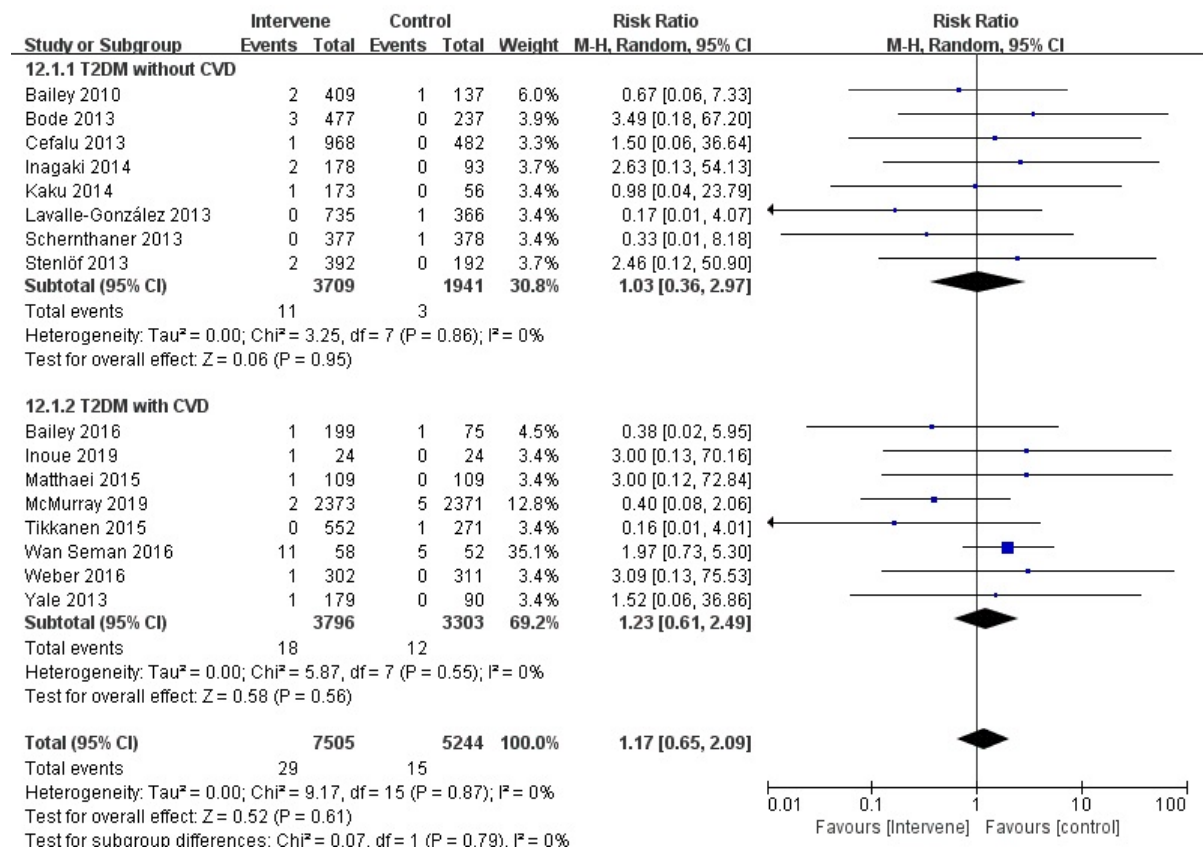

Supplement: supplemental_File.pdf [file supplemental_File.pdf]
