# Supplementary material for: Risk of orthostatic hypotension associated with sodium-glucose cotransporter-2 inhibitor treatment: A meta-analysis of randomized controlled trials
Source: PubMed Central journal article supplement — Diab Vasc Dis Res. 2020 Sep 28;17(5):1479164120953625. doi: 10.1177/1479164120953625 (PMC7919209; doi:10.1177/1479164120953625), 2020-09-28

## **Lists of preferred terms**

Orthostatic hypotension

Blood osmolarity increased, blood pressure ambulatory decreased, blood pressure decreased, blood pressure diastolic decreased, blood pressure immeasurable, blood pressure orthostatic abnormal, blood pressure orthostatic decreased, blood pressure systolic decreased, blood pressure systolic inspiratory decreased, central venous pressure decreased, circulatory collapse, decreased ventricular preload, diastolic hypotension, hypotension, mean arterial pressure decreased, orthostatic heart rate response increased, orthostatic hypotension

## **search strategy**

### **Embase query**

#1 diabetes AND mellitus OR (type AND 2 AND diabetes) OR (type AND ii AND diabetes)  
#2 sodium AND glucose AND cotransporter AND 2 AND inhibitor OR (sodium AND glucose AND transporter AND 2 AND inhibitor\*) OR (sodium AND glucose AND transporter AND ii AND inhibitor\*) OR (sglt2 AND inhibitor\*)  
#3 canagliflozin OR dapagliflozin OR empagliflozin OR ertugliflozin OR tofogliflozin OR ipragliflozin OR remogliflozin  
#4 randomi\*ed AND controlled AND trial OR (randomi\*ed AND trial)  
#5 #2 OR #3  
#6 #1 AND #4 AND #5

### **CENTRAL query**

(Diabetes mellitus or type 2 diabetes or type ii diabetes):ti,ab,kw AND (sodium glucose transporter 2 inhibitor\* or sodium glucose transporter ii inhibitor\* or SGLT2 inhibitor):ti,ab,kw AND (Canagliflozin or Dapagliflozin or Empagliflozin or Ertugliflozin or Tofogliflozin or Ipragliflozin or Remogliflozin):ti,ab,kw (Word variations have been searched)

### **Pubmed query**

#20 Search (((((((((((((Sodium glucose co-transporter) OR (((SGLT2) OR SGLT-2) OR SGLT 2)) OR (((Tofogliflozin) OR Apleway) OR Deberza) OR CSG452)) OR ((Empagliflozin) OR Jardiance)) OR (((dapagliflozin) OR Farxiga) OR Forxiga)) OR ((Canagliflozin) OR Invokana)) OR ((Sotagliflozin) OR LX4211)) OR ((luseogliflozin) OR Lusefi)) OR ((ipragliflozin) OR Suglat)) OR ((remogliflozin) OR BHV091009)) OR ((sergliflozin) OR GW869682X)) OR (((ertugliflozin) OR MK-8835) OR PF-04971729))) AND (((random\*) OR Randomized Controlled Trial[Publication Type]) OR ((RCT) OR RCTs))) AND (((Diabetes mellitus) OR type 2 diabetes) OR type ii diabetes)  
#19 Search ((Diabetes mellitus) OR type 2 diabetes) OR type ii diabetes  
#18 Search ((random\*) OR Randomized Controlled Trial[Publication Type]) OR ((RCT) OR RCTs)  
#17 Search (RCT) OR RCTs  
#16 Search Randomized Controlled Trial[Publication Type]  
#15 Search random\*  
#14 Search (((((((((((((sodium glucose co-transporter) OR (((SGLT2) OR SGLT-2) OR sglT 2)) OR (((tofogliflozin) OR apleway) OR deberza) OR CSG452)) OR ((empagliflozin) OR jardiance)) OR (((dapagliflozin) OR farxiga) OR forxiga)) OR ((canagliflozin) OR invokana)) OR

((sotagliflozin) OR LX4211)) OR ((luseogliflozin) OR lusefi)) OR ((ipragliflozin) OR suglat)) OR ((remo gliflozin) OR BHV091009)) OR ((sergliflozin) OR GW869682X)) OR (((ertugliflozin) OR MK-8835) OR PF-04971729)

#13 Search (((((((((((Sodium glucose co-transporter) OR (((SGLT2) OR SGLT-2) OR SGLT 2)) OR (((Tofogliflozin) OR Apleway) OR Deberza) OR CSG452)) OR ((Empagliflozin) OR Jardiance)) OR (((dapagliflozin) OR Farxiga) OR Forxiga)) OR ((Canagliflozin) OR Invokana)) OR ((Sotagliflozin) OR LX4211)) OR ((luseogliflozin) OR Lusefi)) OR ((ipragliflozin) OR Suglat)) OR ((remogliflozin) OR BHV091009)) OR ((sergliflozin) OR GW869682X)) OR (((ertugliflozin) OR MK-8835) OR PF-04971729)

#12 Search ((ertugliflozin) OR MK-8835) OR PF-04971729

#11 Search (sergliflozin) OR GW869682X

#10 Search (remogliflozin) OR BHV091009

#9 Search (ipragliflozin) OR Suglat

#8 Search (luseogliflozin) OR Lusefi

#7 Search (Sotagliflozin) OR LX4211

#6 Search (Canagliflozin) OR Invokana

#5 Search ((dapagliflozin) OR Farxiga) OR Forxiga

#4 Search (Empagliflozin) OR Jardiance

#3 Search (((Tofogliflozin) OR Apleway) OR Deberza) OR CSG452

#2 Search ((SGLT2) OR SGLT-2) OR SGLT 2

#1 Search Sodium glucose co-transporter

## Result of trim-and-fill method

Meta-analysis

| Method | Pooled Est | 95% CI Lower | 95% CI Upper | Asymptotic z_value | No. of p_value studies |
|--------|------------|--------------|--------------|--------------------|------------------------|
| Fixed  | 0.154      | 0.432        | 0.739        | 0.515              | 0.606 16               |
| Random | 0.154      | 0.432        | 0.739        | 0.515              | 0.606                  |

Test for heterogeneity: Q= 9.168 on 15 degrees of freedom (p= 0.869)

Moment-based estimate of between studies variance = 0.000

Trimming estimator: Linear

Meta-analysis type: Fixed-effects model

| iteration | estimate | Tn | # to trim | diff |
|-----------|----------|----|-----------|------|
| 1         | 0.154    | 61 | 0         | 136  |
| 2         | 0.154    | 61 | 0         | 0    |

Note: no trimming performed; data unchanged

Filled

Meta-analysis (exponential form)

| Method | Pooled Est | 95% CI |       | Asymptotic z_value | p_value | No. of studies |
|--------|------------|--------|-------|--------------------|---------|----------------|
|        |            | Lower  | Upper |                    |         |                |
| Fixed  | 1.166      | 0.650  | 2.094 | 0.515              | 0.606   | 16             |
| Random | 1.166      | 0.650  | 2.094 | 0.515              | 0.606   |                |

Test for heterogeneity: Q= 9.168 on 15 degrees of freedom (p= 0.869)  
Moment-based estimate of between studies variance = 0.000

### Result of subgroup analysis of background treatment

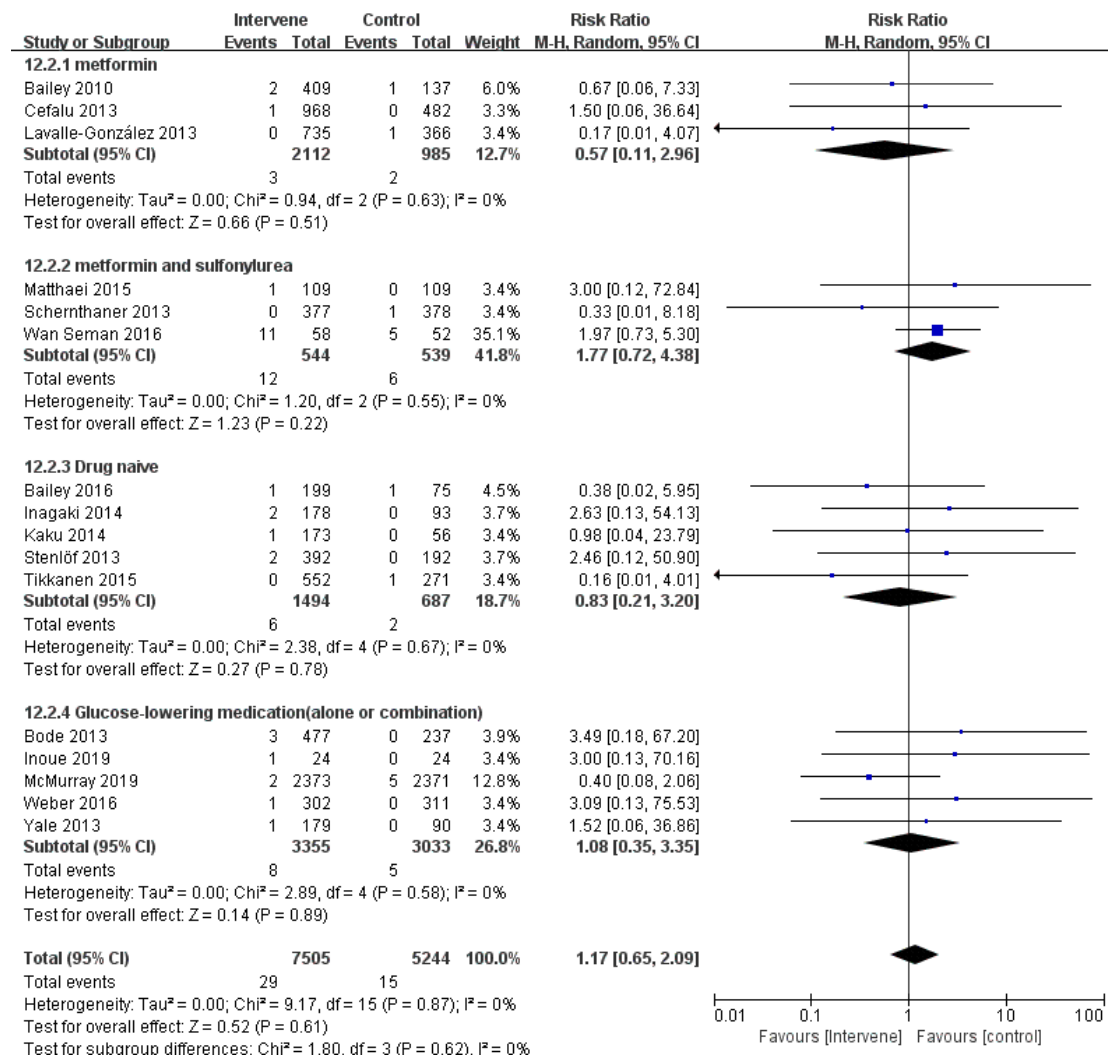

Supplement: supplemental_File_2.pdf [file supplemental_File_2.pdf]
